# Supplementary material
Source: Elsevier journal article supplement (https://www.sciencedirect.com/science/article/pii/S1695403320301405)
Supplement: mmc1 [file S1695403320301405:mmc1.doc]

**Anexo A. Características del hospital en el cual se realiza el estudio.**

Se trata del único hospital público de la provincia y atiende a una población aproximada de 12.500 pacientes de 0 a 14 años. La asistencia inicial, con la toma de decisiones diagnósticas y terapéuticas, de un caso de BA que acude al hospital es llevada a cabo en la Unidad de Urgencias por médicos de familia. Aproximadamente un total de 100 a 150 casos de BA son atendidos en la Unidad de Urgencias hospitalaria, dando lugar a una media de 24 ingresos anualmente. El personal sanitario implicado en todo el proceso de atención hospitalaria de los pacientes con esta patología está compuesto por 22 médicos de urgencias, 43 enfermeras y auxiliares de enfermería de urgencias, 14 celadores, 10 pediatras y 15 enfermeros y auxiliares de enfermería pediátrica.
